# Supplementary material
Source: publisher figshare collection journal article supplement (https://gsajournals.figshare.com/ndownloader/files/22291752)
Supplement: Supplementary file 1 [file 22291752]

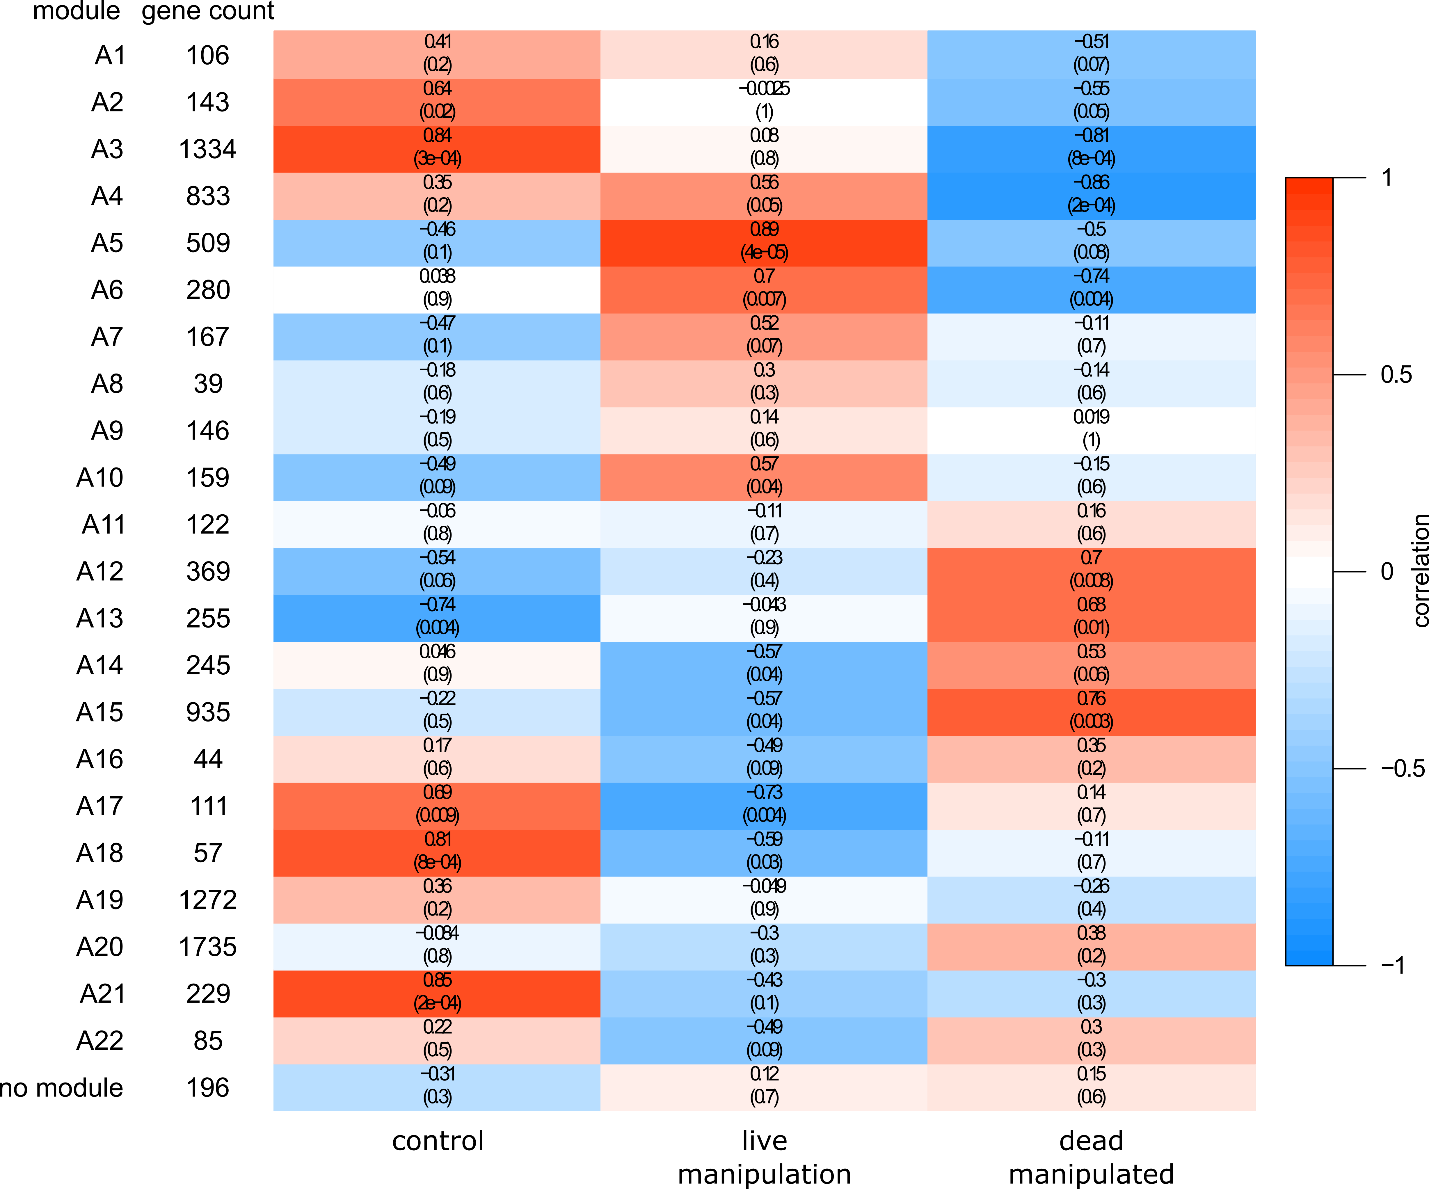


**Figure S3.** WGCNA of ant normalized gene expression data correlated to sample type. Correlation values are the top value in each cell, the p-values are in parentheses below.
